# Supplementary material for: Synthesis and characterisation of dimanganese(iii) complexes of 1,5-bis(X-salicylidenamino)pentan-3-ol (X = 3- or 5-methoxy) and their catalytic activity towards hydrogen peroxide disproportionation
Source: Royal Society of Chemistry journal article supplement (doi:10.1039/b204566d), 2002-01-01
Supplement: b204566d.pdf [file b204566d.pdf]

**Synthesis and characterisation of dimanganese(III) complexes of 1,5-bis(X-salicylidenamino)pentan-3-ol (X = 3- and 5-methoxy) and their catalytic activity toward hydrogen peroxide disproportionation**

Claudia Palopoli<sup>a</sup>, Manuel González-Sierra<sup>b</sup>, Gustavo Robles<sup>a</sup>, Françoise Dahan<sup>c</sup>, Jean-Pierre Tuchagues<sup>c</sup>, and Sandra Signorella<sup>a,\*</sup>

**Supporting Information**

<sup>a</sup> *Departamento de Química, Facultad de Ciencias Bioquímicas y Farmacéuticas, UNR, Suipacha 531, 2000 Rosario, Argentina. E-mail: [signorel@infovia.com.ar](mailto:signorel@infovia.com.ar)*

<sup>b</sup> *Instituto de Química Orgánica de Síntesis (IQUIOS), CONICET – UNR, Suipacha 531, 2000 Rosario, Argentina*

<sup>c</sup> *Laboratoire de Chimie de Coordination du CNRS, UPR 8241, 205 Route de Narbonne, 31077 Toulouse Cedex, France*

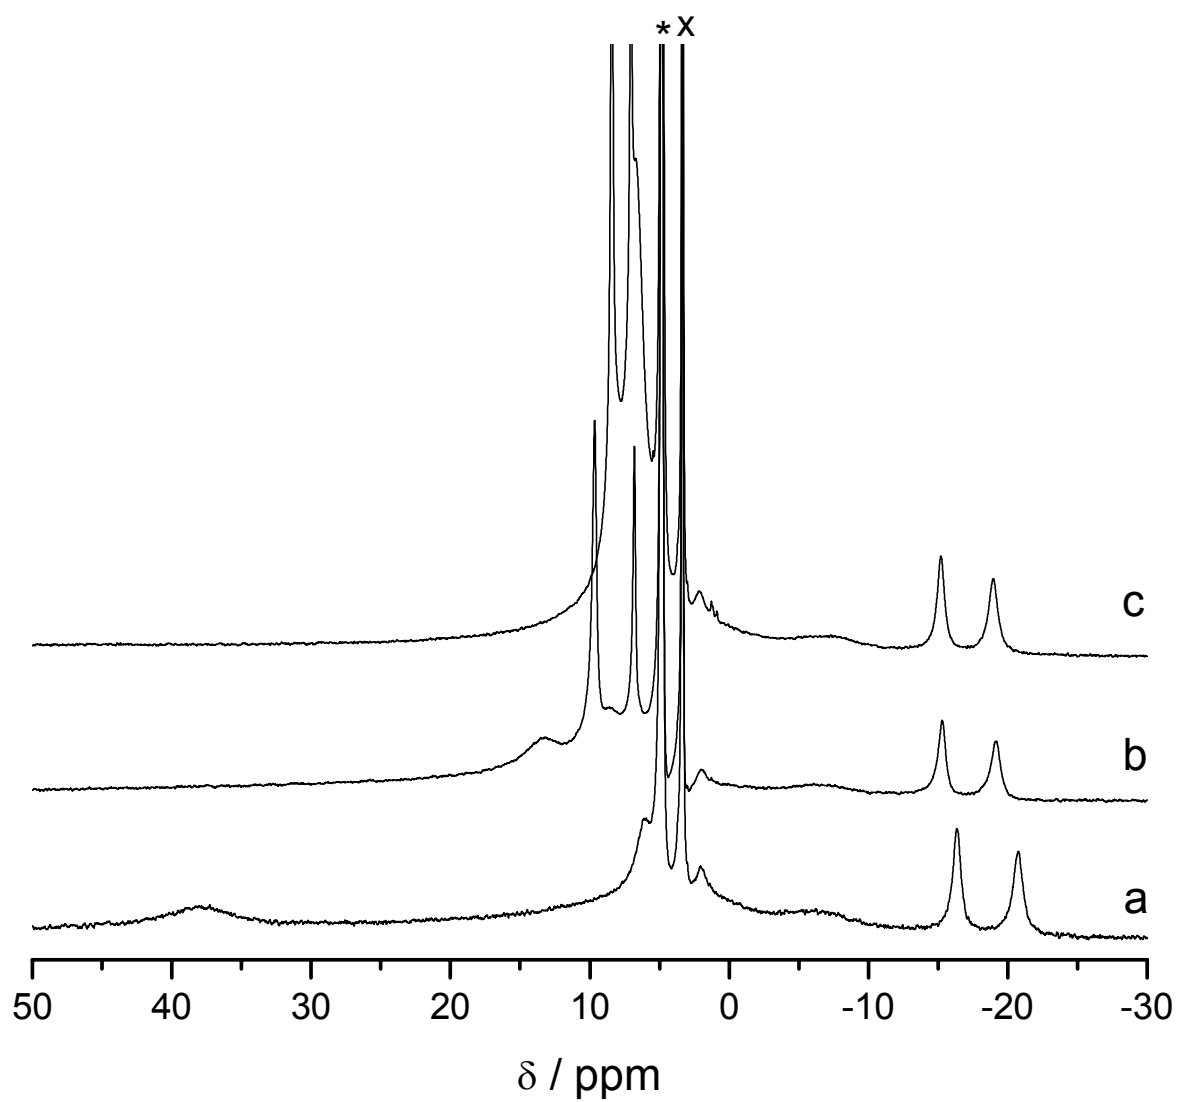

Figure S1. <sup>1</sup>H NMR spectra of (a) **3** (17 mM); (b) after addition of 3 equiv of sodium benzoate; (c) after addition of excess NaOAc to the solution (b), in d<sub>4</sub>-methanol. \*water, <sup>x</sup>solvent.

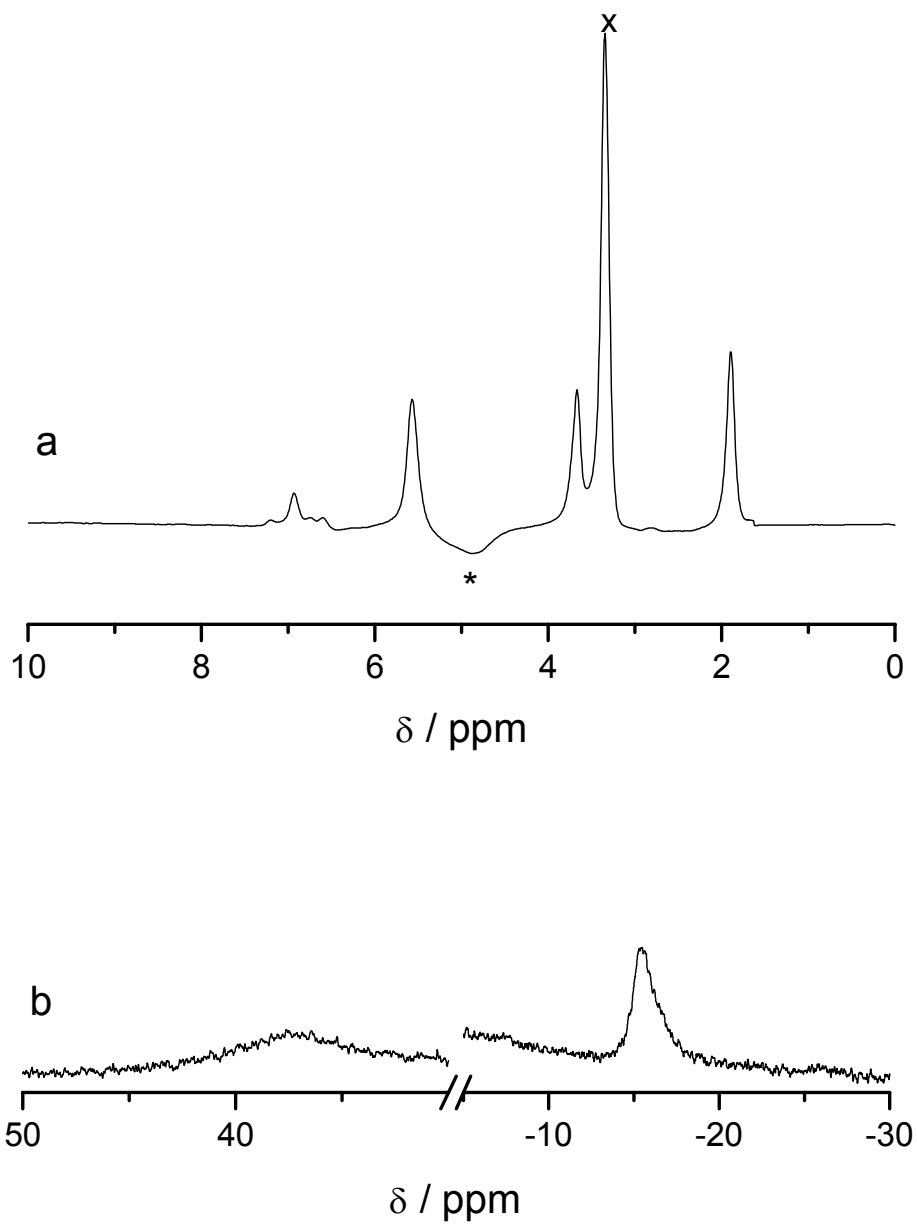

Figure S2.  $^1\text{H}$  NMR spectra of **1** (15 mM) in (a) 0.15 M NaOMe; (b)  $\text{d}_7\text{-dmf}$ . \*water suppressed,  $^x$ solvent.

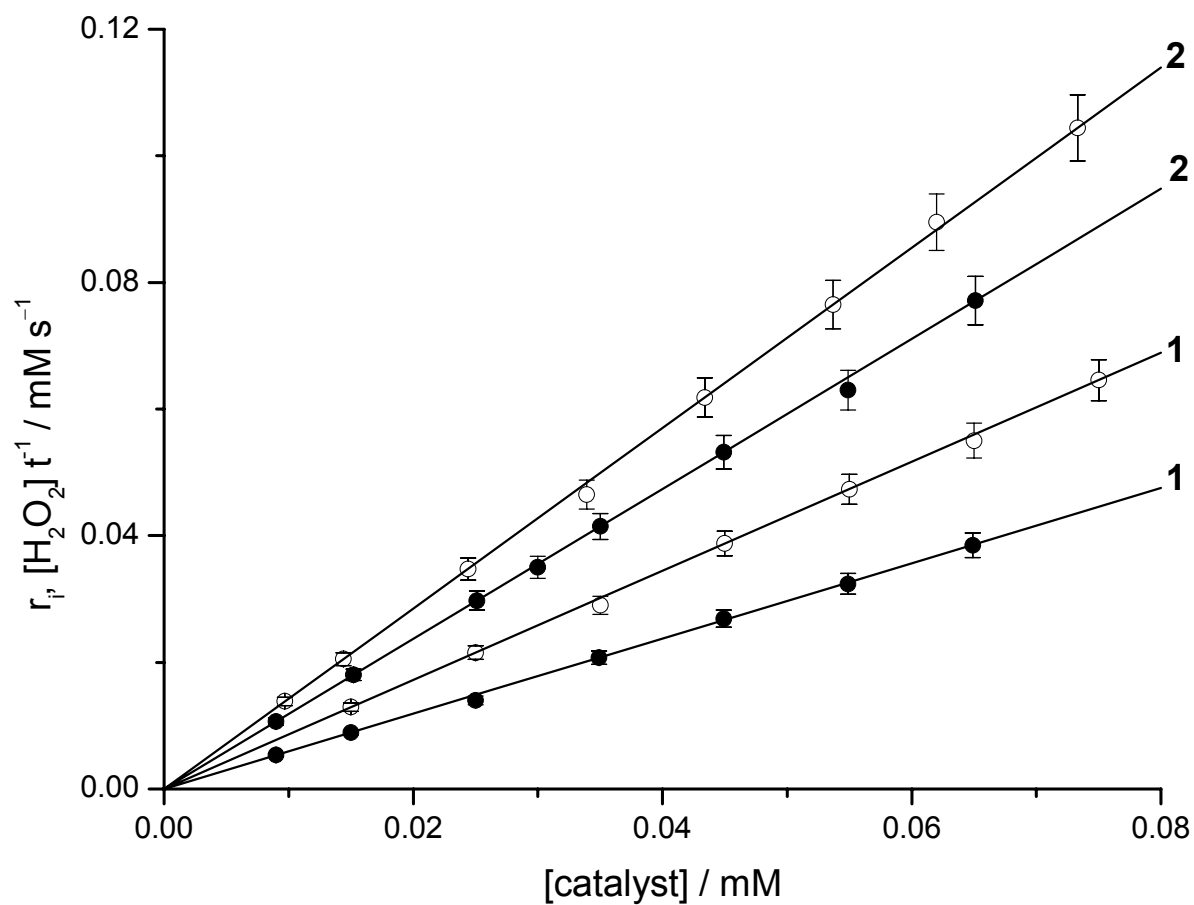

Figure S3. Effect of the [catalyst] on the initial rate of H<sub>2</sub>O<sub>2</sub> disproportionation at 25°C.

(●) methanol, [H<sub>2</sub>O<sub>2</sub>] = 30 mM; (○) dmf; [H<sub>2</sub>O<sub>2</sub>] = 55 mM.

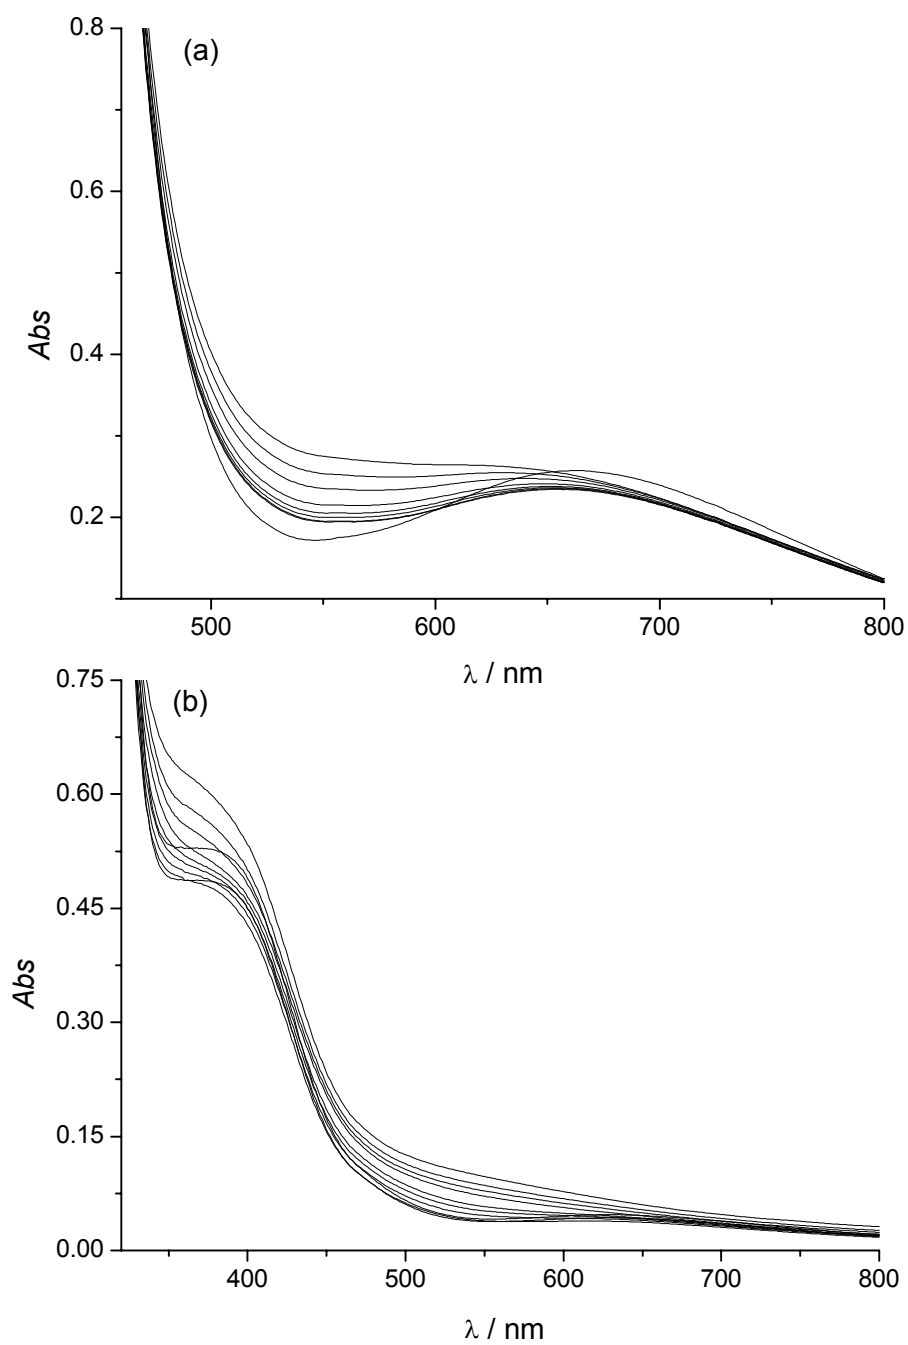

Figure S4. Time evolution of the uv-vis spectrum of a mixture of (a) **1** and (b) **2** with  $\text{H}_2\text{O}_2$  in methanol. Conditions:  $[\mathbf{1}] = 0.6 \text{ mM}$ ,  $[\mathbf{2}] = 0.1 \text{ mM}$ ,  $[\text{H}_2\text{O}_2]:[\text{catalyst}] = 50:1$ ,  $T = 25^\circ\text{C}$ , over a period of ca. 1 h.

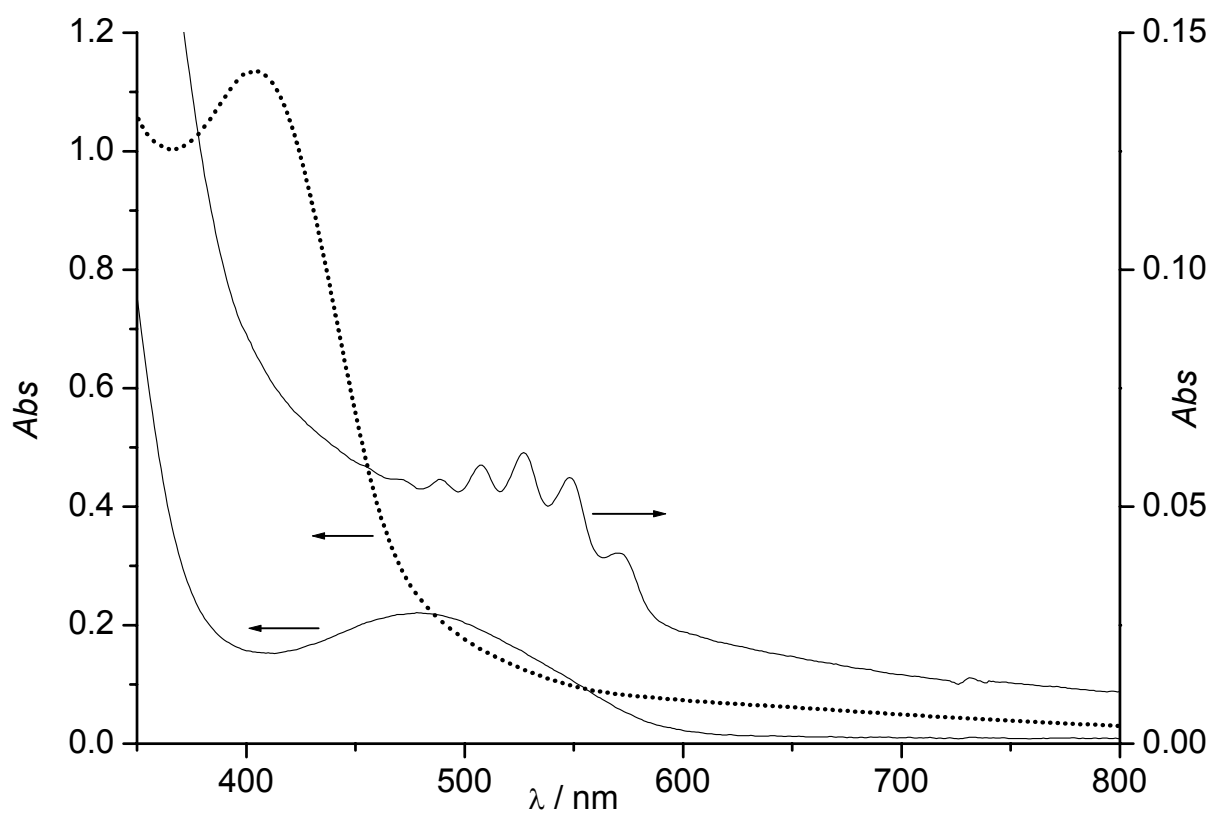

Figure S5. Electronic spectra of the starting catalyst ( $\cdots$ ) and species observed ( $\text{---}$ ) during the oxygen evolution in dmf. Conditions:  $[\mathbf{1}] = 190 \mu\text{M}$ ,  $[\text{H}_2\text{O}_2] = 364 \text{ mM}$ ,  $T = 25^\circ\text{C}$ .
